# Supplementary material for: LINC01189-miR-586-ZEB1 feedback loop regulates breast cancer progression through Wnt/β-catenin signaling pathway
Source: PubMed Central journal article supplement — Mol Ther Nucleic Acids. 2021 Jun 24;25:455–67. doi: 10.1016/j.omtn.2021.06.007 (PMC8408558; doi:10.1016/j.omtn.2021.06.007), 2021-06-24
Supplement: mmc1.pdf [file mmc1.pdf]

OMTN, Volume 25

## Supplemental information

**LINC01189-miR-586-ZEB1 feedback loop  
regulates breast cancer progression  
through Wnt/ $\beta$ -catenin signaling pathway**

**Di Zhang, Xiaofeng Liu, Yun Li, Li Sun, Shu-Shu Liu, Yue Ma, Huan Zhang, Xin Wang, and Yue Yu**

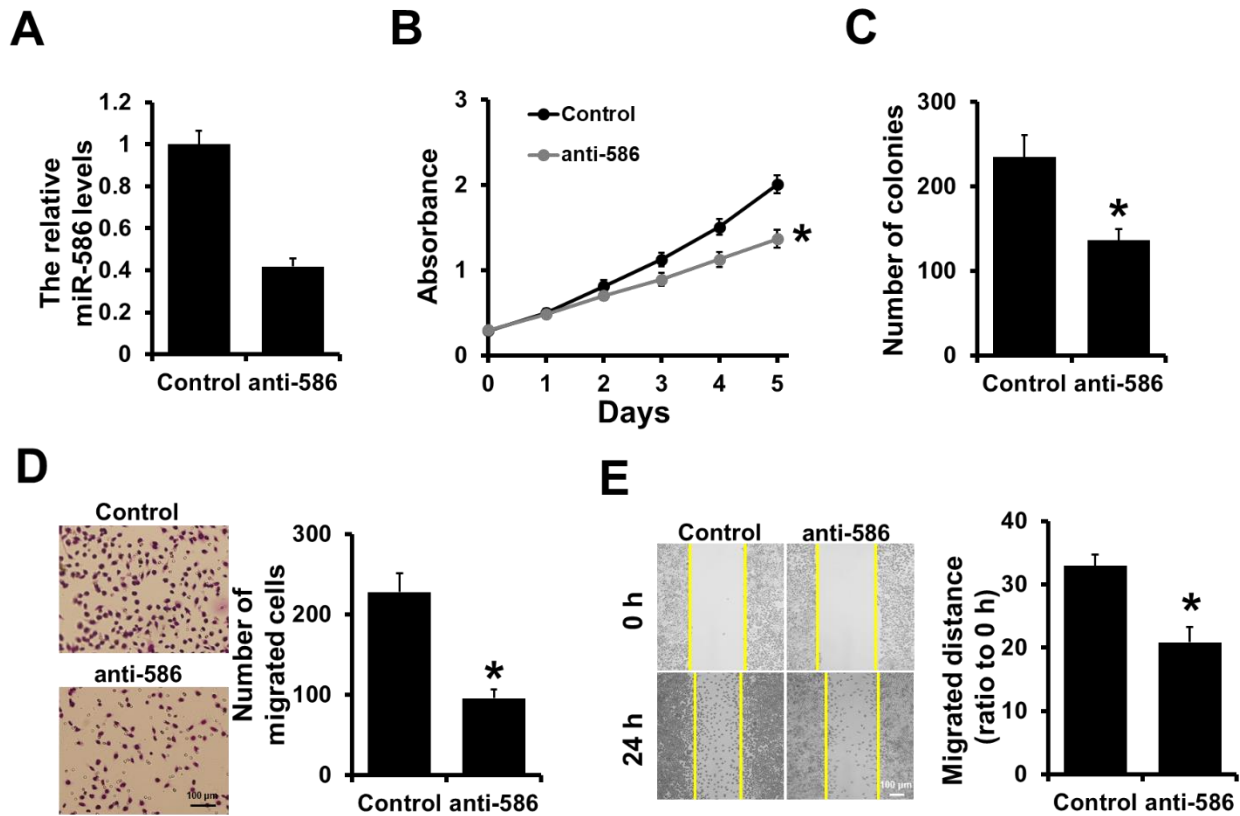

**Figure S1. miR-586 functions as an oncogene in breast cancer.** **A**, Expression of miR-586 in miR-586-depleted BT549 cells, as well as the control cells by RT-qPCR. **B-C**, MTT (**B**) and colony formation (**C**) analyses of the proliferation of cells described in (**A**). **D**, Transwell analysis of the invasion of cells described in (**A**). **E**, wound-healing analysis of the migration of cells described in (**A**). The data shown in **A-E** are the mean  $\pm$  s. d. for three independent replicates. Student's t-test for **A-E**. \* $P < 0.05$ .

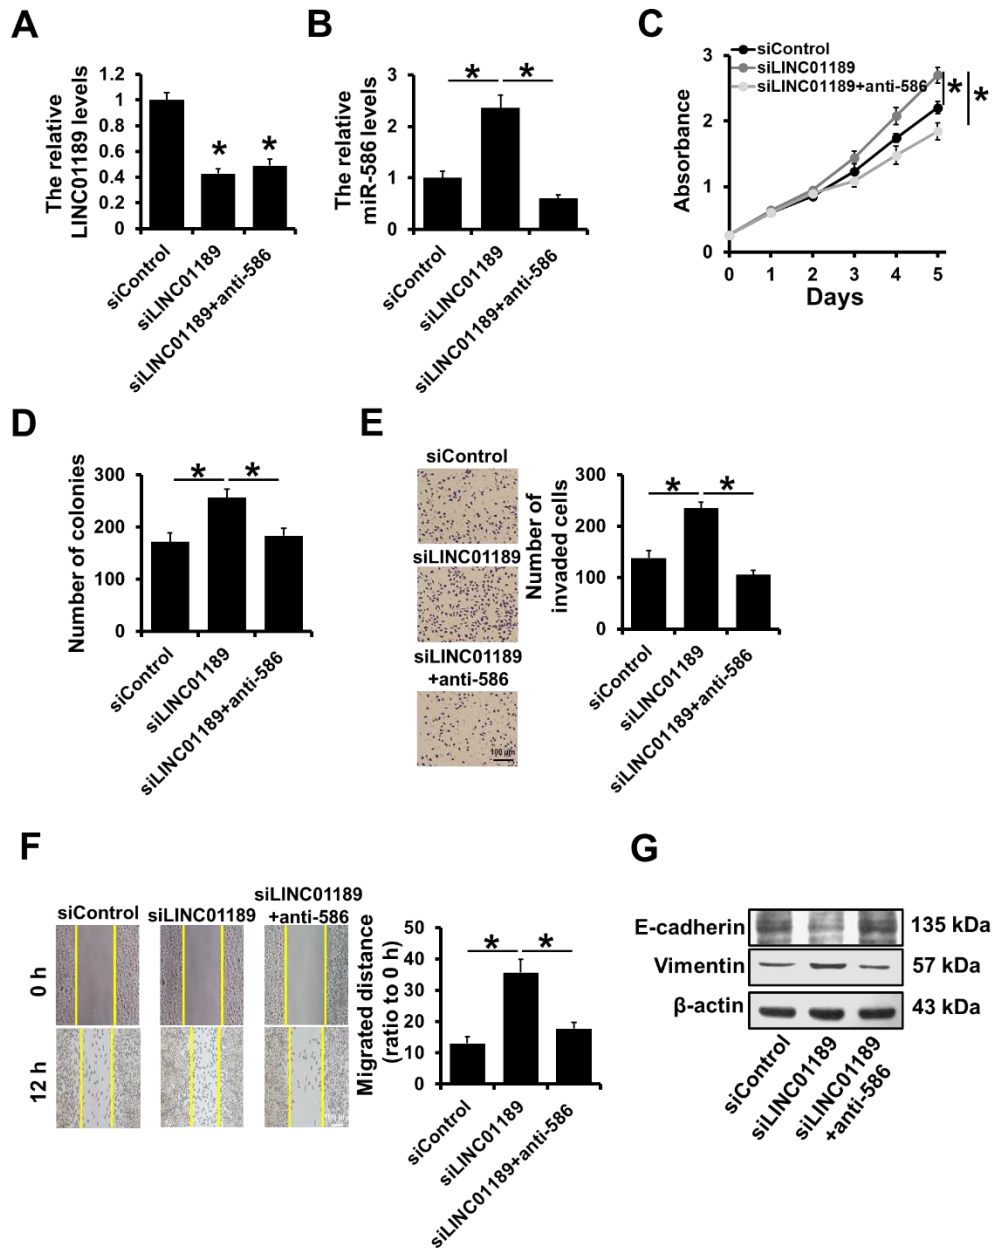

**Figure S2. LIN01189 suppressed breast cancer progression by sponging miR-586. A and B,** Relative expression of LINC01189 (A) or miR-586 (B) in LINC01189 siRNAs-transfected SKBR3 cells with or without miR-586 inhibitor determined by RT-qPCR. **C-D,** MTT (C) and colony formation (D) analyses of the proliferation of cells described in (A). **E,** Transwell analysis of the invasion of cells described in (A). **F,** wound-healing analysis of the migration of cells described in (A). **G,** Western blot was used to detect the expression of epithelial marker E-cadherin and mesenchymal marker Vimentin in the cells described in (A). \* $p < 0.05$ .

**Table S1. Oligonucleotides of miRNAs and siRNAs**

|                     |                         |
|---------------------|-------------------------|
| miR-586 mimics      | UAUGCAUUGUAUUUUUAGGUCC  |
| miR-586 inhibitor   | AUACGUAACAUA AAAAUCCAGG |
| mimic control       | UGUACCAAUUUCCAGUGGAGAU  |
| inhibitor control   | AUGGUGUUAUCAAGUGUAACAG  |
| siTwist1            | GGUACAUCGACUCCUCUATT    |
| siSnail             | GGACUUUGAUGAAGACCAUTT   |
| siZEB1              | GCUGUUGUUCUGCCAACAGTT   |
| siTCF4              | CGGCACACA UUGUCUCAATT   |
| si $\beta$ -catenin | CACUUGCAAUAAUACAAATT    |

**Table S2. Oligonucleotides used for RT-qPCR**

| Name          | Sequence (5' to 3')      |
|---------------|--------------------------|
| LINC01189 up  | GTCTGCCCAGCTACTCCAAG     |
| LINC01189 low | CTCCTACCGCTCCTGTTGAG     |
| miR-586 up    | AGTACTGGTCTCAGCAGATTGA   |
| miR-586 low   | GTGTCATCTCAGCAGCTCCA     |
| U6 up         | CTCGCTTCGGCAGCACA        |
| U6 low        | AACGCTTCACG AATTTGCGT    |
| SFRP1 up      | ACTGGCCCGAGATGCTTAAGTG   |
| SFRP1 low     | GAGATGTTCAATGATGGCCTCAGA |
| DKK2 up       | GTACCAAGGACTGGCATTCTG    |
| DKK2 low      | ATCTCGGTGGCAGCGCTTCT     |
| WIF1 up       | CGAGGTACGCAATAGGAGTG     |
| WIF1 low      | CACGTGCAGTTGTACTTGCAGT   |
| DKK3 up       | TGAGATGTTCCGCGAGGTTG     |
| DKK3 low      | CAGGTTCACTTCTGATGATGCT   |
| RPRD1A up     | GCTCTGTATGGTGATAAG       |
| RPRD1A low    | TCTTGTAATGCTCTAACG       |
| APC up        | CCTCATCCAGCTTTTACATGGC   |
| APC low       | GCCCGAGCCTCTTTACTGC      |
| ZEB1 up       | TCAAAAGGAAGTCAATGGACAA   |
| ZEB1 low      | GTGCAGGAGGGACCTCTTTA     |
| GAPDH up      | CAAGGTCATCCATGACA ACTTTG |
| GAPDH low     | GTCCACCACCCTGTTGCTGTAG   |

**Table S3. Oligonucleotides used for ChIP and FISH**

| <b>Name</b>   | <b>Sequence (5' to 3')</b> |
|---------------|----------------------------|
| LINC01189 up  | GCTGATGAACATAGATGCAA       |
| LINC01189 low | TTACAGGTGTGAGCCACCAC       |
| ZEB1 up       | CGCTGAAGCCGGATAATGGG       |
| ZEB1 low      | ACATGTTTCAGGTCTCGATCC      |
| FISH probe    | TGCCACCTGCGACTGTCTCACGAGTT |

**Table S4. Antibodies used for study**

| <b>Name</b>                         | <b>Source</b>     | <b>Catalog</b> |
|-------------------------------------|-------------------|----------------|
| $\beta$ -Catenin (D10A8) Rabbit mAb | Cell Signaling    | 8480           |
| $\beta$ -Actin (8H10D10) Mouse mAb  | Cell Signaling    | 3700           |
| Histone H3 (D1H2) Rabbit mAb        | Cell Signaling    | 4499           |
| Anti-TCF-4 antibody                 | Abcam             | ab130014       |
| Anti-DKK2 antibody                  | Abcam             | ab38594        |
| Anti-DKK3 antibody                  | Abcam             | ab126080       |
| Anti-SFRP1 antibody                 | Abcam             | ab126613       |
| E-cadherin antibody (1.B.54)        | SantaCruz Biotech | sc-71009       |
| Vimentin antibody (V9)              | SantaCruz Biotech | sc-6260        |
| Anti-ZEB1 antibody                  | Abcam             | ab180905       |
